# Supplementary material for: Plasma phenylalanine and tyrosine and their interactions with diabetic nephropathy for risk of diabetic retinopathy in type 2 diabetes
Source: PubMed Central journal article supplement — BMJ Open Diabetes Res Care. 2020 Sep 3;8(1):e000877. doi: 10.1136/bmjdrc-2019-000877 (PMC7473660; doi:10.1136/bmjdrc-2019-000877), 2020-09-03
Supplement: bmjdrc-2019-000877supp001.pdf [file bmjdrc-2019-000877supp001.pdf]

Table S1. Global amino acids profile according to DR status

|               | DR                     | Non-DR                 | P-value |
|---------------|------------------------|------------------------|---------|
| Alanine       | 127.70 (38.26)         | 129.40 (45.43)         | 0.656   |
| Arginine      | 10.23 (6.33-16.28)     | 10.63 (5.77-17.40)     | 0.874   |
| Asparagine    | 73.40 (22.06)          | 78.62 (24.42)          | 0.012   |
| Aspartic acid | 29.47 (12.34)          | 30.68 (13.13)          | 0.276   |
| Citrulline    | 21.20 (16.34-27.41)    | 19.64 (15.33-25.68)    | 0.099   |
| Cystine       | 1.26 (0.88-1.68)       | 1.27 (0.93-1.68)       | 0.682   |
| Glutamine     | 7.10 (5.46-9.67)       | 6.78 (5.00-9.20)       | 0.104   |
| Glutamate     | 91.94 (72.13-110.65)   | 99.51 (81.98-122.01)   | 0.001   |
| Glycine       | 177.97 (135.52-232.32) | 206.67 (154.97-269.64) | <.001   |
| Homocysteine  | 7.88 (6.56-8.56)       | 7.88 (6.57-8.37)       | 0.624   |
| Histidine     | 44.01 (34.00-67.26)    | 52.74 (35.74-79.84)    | 0.007   |
| Leucine       | 120.50 (40.38)         | 135.30 (47.56)         | <.001   |
| Lysine        | 147.30 (68.63)         | 140.3 (79.04)          | 0.246   |
| Methionine    | 17.16 (5.39)           | 18.51 (6.74)           | 0.005   |
| Ornithine     | 16.02 (11.80-23.17)    | 17.60 (13.36-23.73)    | 0.158   |
| Proline       | 452.40 (189.3)         | 477.2 (204.5)          | 0.153   |
| Serine        | 48.18 (41.53-58.68)    | 52.15 (43.78-65.26)    | 0.001   |
| Threonine     | 25.69 (9.33)           | 26.52 (10.56)          | 0.353   |
| Tryptophan    | 44.77 (12.14)          | 49.19 (12.14)          | <.001   |
| Valine        | 133.00 (33.88)         | 142.10 (42.22)         | 0.003   |

Abbreviations: DR, Diabetic retinopathy;

Data are mean (SD), median (IQR), or n (%).

P-value was acquired by comparing DR and Non-DR; P values were derived from independent samples Student t test for normally distributed variables or Mann-Whitney U test for skewed distributions.

Table S2. Characteristics and odds ratio of tyrosine and phenylalanine for DR risk using T2D patients chosen via propensity method

|                                    | DR           | Non-DR       | P-value# |
|------------------------------------|--------------|--------------|----------|
| <b>Clinical characteristics</b>    |              |              |          |
| N                                  | 162          | 162          |          |
| Age, years                         | 57.8 (10.0)  | 58.7 (14.2)  | 0.487    |
| Sex, male                          | 89 (54.9)    | 86 (53.1)    | 0.738    |
| Duration of DM, years              | 10 (7-19)    | 13 (6-20)    | 0.679    |
| Body mass index, kg/m <sup>2</sup> | 25.1 (3.3)   | 24.9 (3.8)   | 0.639    |
| ~18.5                              | 1 (0.6)      | 3 (1.9)      | 0.260    |
| 18.5~24.0                          | 64 (39.5)    | 73 (45.1)    |          |
| 24.0~28.0                          | 66 (40.7)    | 50 (30.9)    |          |
| 28.0~                              | 31 (19.1)    | 36 (22.2)    |          |
| SBP, mmHg                          | 145.6 (25.3) | 143.7 (27.3) | 0.510    |
| HbA1c, %                           |              |              |          |
| ~7                                 | 15 (9.3)     | 17 (10.5)    | 0.782    |
| 7~8                                | 16 (9.9)     | 18 (11.1)    |          |
| 8~                                 | 64 (39.5)    | 69 (42.6)    |          |
| Lack                               | 67 (41.4)    | 58 (35.8)    |          |
| HDL-C, mmol/L                      |              |              |          |
| <1.00 in male or <1.30 in female   | 58 (35.8)    | 74 (45.7)    | 0.179    |
| ≥1.00 in male or ≥1.30 in female   | 36 (22.2)    | 33 (20.4)    |          |
| lack                               | 68 (42.0)    | 55 (34.0)    |          |
| LDL-C, mmol/L                      |              |              |          |
| <2.60                              | 38 (23.5)    | 41 (25.3)    | 0.315    |
| ≥2.60                              | 56 (34.6)    | 66 (40.7)    |          |
| lack                               | 68 (42.0)    | 55 (34.0)    |          |
| Triglyceride, mmol/L               |              |              |          |
| <1.70                              | 46 (28.4)    | 35 (21.6)    | 0.016    |
| ≥1.70                              | 48 (29.6)    | 73 (45.1)    |          |
| Antidiabetic agents                | 68 (42.0)    | 54 (33.3)    | 0.331    |
| Insulin                            | 137 (84.6)   | 143 (88.3)   | 0.886    |
| Hypotensive agents                 | 132 (81.5)   | 133 (82.1)   | 0.736    |
| Lipid-lowering agents              | 71 (43.8)    | 68 (42.0)    | 0.498    |
| Diabetic nephropathy               | 63 (38.9)    | 69 (42.6)    | 0.820    |
| Tyrosine, μmol/L                   | 41.5 (12.4)  | 46.2 (15.4)  | 0.0029   |
| <64                                | 156 (96.3)   | 142 (87.7)   | 0.0068   |
| ≥64                                | 6 (3.7)      | 20 (12.3)    |          |
| Phenylalanine, μmol/L              | 41.0 (10.2)  | 48.2 (14.9)  | <.0001   |
| <64                                | 158 (97.5)   | 139 (85.8)   | 0.0002   |
| ≥64                                | 4 (2.5)      | 23 (14.2)    |          |

We selected this population through propensity score matching, with DR as dependent variable, age, sex, BMI (<18.5 kg.m-2, 18.5 kg.m-2-24.0 kg.m-2, 24.0 kg.m-2-28.0 kg.m-2 and >28.0 kg.m-2), duration of diabetes, SBP, HDL-C (<1.0mmol/L in male or <1.3mmol/L in female, ≥1mmol/L in male or ≥1.3 mmol/L in female, lack), LDL-C (<2.6mmol/L, ≥2.6 mmol/L, lack), HbA1c (<7%, 7%~8%, ≥8%, lack), triglyceride (<1.7mmol/L, ≥1.7mmol/L, lack), diabetic nephropathy, antidiabetic drugs, lipid lowering drugs and antihypertensive drugs as independent variables.

Abbreviations: DR, Diabetic retinopathy; SBP, Systolic blood pressure; HDL-C, high-density lipoprotein cholesterol; LDL-C, low-density lipoprotein cholesterol; HbA1c, glycated hemoglobin;

Data are mean (SD), median (IQR), or n (%).

P-value was acquired by comparing DR and Non-DR; P values were derived from independent-samples Student t test for normally distributed variables, Mann-Whitney U test for skewed distributions, Chi-square test (or fisher test if appropriate) for categorical variables.

Table S3. Odds ratio of tyrosine and phenylalanine for DR risk in subgroup chosen via propensity method

|                            | OR   | 95%CI     | P-value |
|----------------------------|------|-----------|---------|
| <b>Univariable model</b>   |      |           |         |
| Tyr<64 vs. ≥64, μmol/L     | 3.66 | 1.43-9.38 | 0.007   |
| Phe<64 vs. ≥64, μmol/L     | 6.53 | 2.21-19.4 | 0.001   |
| <b>Multivariable model</b> |      |           |         |
| Tyr<64 vs. ≥64, μmol/L     | 4.26 | 1.59-11.4 | 0.004   |
| Phe<64 vs. ≥64, μmol/L     | 8.06 | 2.58-25.1 | <0.001  |

Abbreviations: DR, Diabetic retinopathy; Phe, phenylalanine; Tyr, tyrosine; OR, odds ratio; CI, confidence interval.

Multivariable model was adjusted for independent variables used in propensity method as listed in Table S2.
